# Supplementary material for: Screening of GABA-Producing Lactic Acid Bacteria from Thai Fermented Foods and Probiotic Potential of Levilactobacillus brevis F064A for GABA-Fermented Mulberry Juice Production
Source: PubMed Central journal article supplement (PMC7823765; doi:10.3390/microorganisms9010033), 2020-12-24
Supplement: microorganisms-09-00033-s001.pdf [file microorganisms-09-00033-s001.pdf]

## Screening of GABA-Producing Lactic Acid Bacteria from Thai Fermented Foods and Probiotic Potential of *Levilactobacillus Brevis* F064A for GABA-Fermented Mulberry Juice Production

Jirapat Kanklai <sup>1,2</sup>, Tasneem Somwong <sup>3</sup>, Patthanasak Rungsirivanich <sup>1,2</sup> and Narumol Thongwai <sup>1,4,\*</sup>

**Table S1.** Isolation sources, basic morphology and GABA content (mg/ml) of 36 selected GABA-producing LABs.

| Code  | Source, Province                   | Gram stain | Cell shape | GABA content (mg/ml) (mean ± SD) |
|-------|------------------------------------|------------|------------|----------------------------------|
| F002A | Fermented pork, Chiang Mai         | +          | rod        | 0.20 ± 0.07                      |
| F003A | Fermented pork, Chiang Mai         | +          | rod        | 0.33 ± 0.02                      |
| F005A | Fermented pork, Chiang Mai         | +          | rod        | 0.40 ± 0.08                      |
| F007A | Fermented pork, Chiang Mai         | +          | rod        | 0.17 ± 0.13                      |
| F015A | Small fermented pork, Chiang Mai   | +          | rod        | 0.59 ± 0.07                      |
| F017A | Small fermented pork, Chiang Mai   | +          | rod        | 0.23 ± 0.08                      |
| F018A | Small fermented pork, Chiang Mai   | +          | rod        | 0.21 ± 0.13                      |
| F019A | Small fermented pork, Chiang Mai   | +          | rod        | 1.68 ± 0.13                      |
| F020A | Small fermented pork, Chiang Mai   | +          | rod        | 0.08 ± 0.01                      |
| F021A | Small fermented pork, Chiang Mai   | +          | rod        | 0.85 ± 0.03                      |
| F024A | Thai fermented sausage, Chiang Mai | +          | rod        | 0.10 ± 0.04                      |
| F032A | Fermented pork, Lampang            | +          | rod        | 1.73 ± 0.11                      |
| F033A | Fermented pork, Lampang            | +          | rod        | 0.16 ± 0.01                      |
| F045A | Fermented vegetable, Chiang Mai    | +          | Cocci      | 0.09 ± 0.01                      |
| F055A | Fermented pork rip, Lampang        | +          | cocci      | 0.09 ± 0.03                      |
| F059A | Fermented pork rip, Lampang        | +          | rod        | 0.09 ± 0.04                      |
| F061A | Fermented pork rip, Lampang        | +          | cocci      | 0.09 ± 0.03                      |
| F062A | Thai fermented sausage, Chiang Mai | +          | rod        | 0.09 ± 0.04                      |
| F063A | Thai fermented sausage, Chiang Mai | +          | rod        | 0.06 ± 0.02                      |
| F064A | Thai fermented sausage, Chiang Mai | +          | rod        | 2.85 ± 0.10                      |

---

|       |                                    |   |     |                 |
|-------|------------------------------------|---|-----|-----------------|
| F066A | Thai fermented sausage, Chiang Mai | + | rod | $0.36 \pm 0.12$ |
| F067A | Thai fermented sausage, Chiang Mai | + | rod | $0.38 \pm 0.11$ |
| F068A | Fermented pork, Chiang Mai         | + | rod | $0.21 \pm 0.11$ |
| F073A | Fermented pork, Chiang Mai         | + | rod | $0.16 \pm 0.11$ |
| F074A | Fermented Fish, Chiang Mai         | + | rod | $0.13 \pm 0.04$ |
| F081A | Fermented fish, Chiang Rai         | + | rod | $0.57 \pm 0.02$ |
| F082A | Fermented fish, Chiang Rai         | + | rod | $0.21 \pm 0.08$ |
| F083A | Fermented fish, Chiang Rai         | + | rod | $0.08 \pm 0.02$ |
| F084A | Fermented fish, Chiang Rai         | + | rod | $0.15 \pm 0.02$ |
| F085A | Fermented fish, Chiang Rai         | + | rod | $0.90 \pm 0.13$ |
| F086A | Fermented meat, Chiang Rai         | + | rod | $0.48 \pm 0.12$ |
| F087A | Fermented meat, Chiang Rai         | + | rod | $1.04 \pm 0.06$ |
| F088A | Fermented meat, Chiang Rai         | + | rod | $0.62 \pm 0.04$ |
| F089A | Fermented meat, Chiang Rai         | + | rod | $0.38 \pm 0.02$ |
| F091A | Fermented meat, Chiang Rai         | + | rod | $0.51 \pm 0.02$ |
| F092A | Fermented meat, Chiang Rai         | + | rod | $0.46 \pm 0.12$ |

---

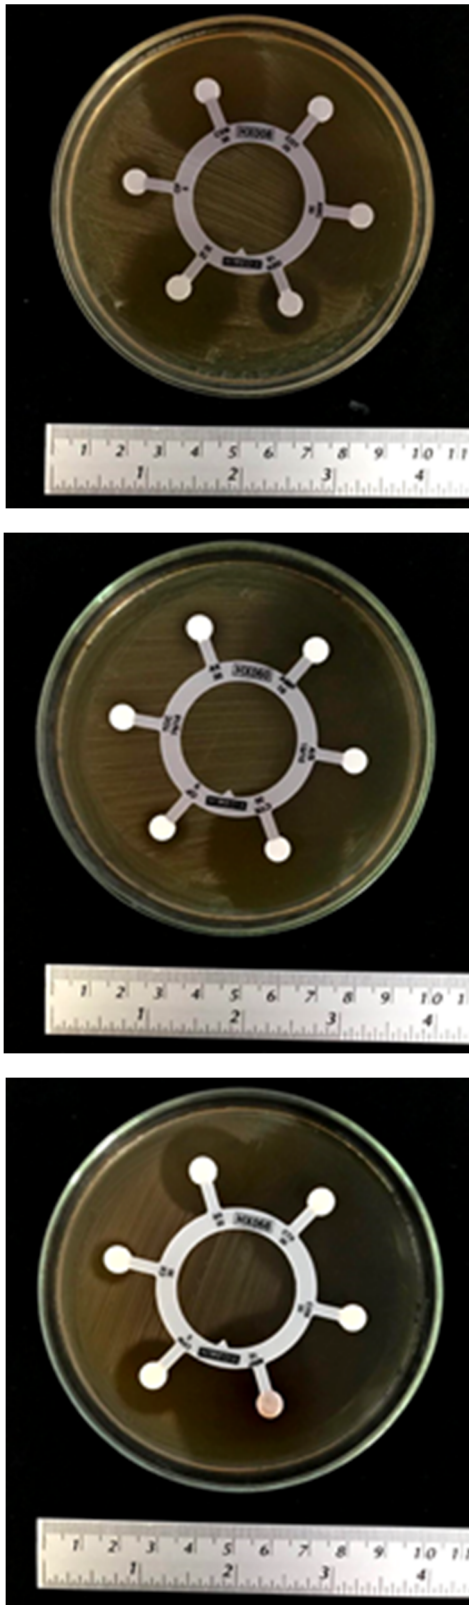

**Figure S1.** Inhibition zone (mm) of antibiotic susceptibility test of *L. brevis* F06A with antibiotic disc group Hexa G-minus 3 (A), Hexa G-minus 11 (B) and Hexa G-minus 19 (C).
